# Supplementary material for: Focal accumulation of preribosomes outside the nucleolus during metaphase–anaphase in budding yeast
Source: PubMed Central journal article supplement (PMC5558912; doi:10.1261/rna.061259.117), 2017-09
Supplement: supp_061259.117_Supplemental_Table_S1.pdf [file supp_061259.117_Supplemental_Table_S1.pdf]

**TABLE S1. Yeast strains used in this study**

| <b>Name</b> | <b>Genotype*</b>                                                                                 | <b>Source</b>     |
|-------------|--------------------------------------------------------------------------------------------------|-------------------|
| W303a       | <i>MATa, ade2, his3, leu2, trp1, ura3</i>                                                        | Euroscarf         |
| A2596       | <i>MATa, ade2, his3, leu2, trp1, ura3, cdc15-2</i>                                               | A. Amon (1)       |
| A5321       | <i>MATa, ade2, his3, leu2, trp1, ura3, cdc14-3</i>                                               | A. Amon (1)       |
| K2788       | <i>MATa, ade2, leu2, ura3, esp1-1</i>                                                            | S. Elledge (2)    |
| LGY101      | <i>S288c, MATa, leu2, trp1, ura3, rat7-1</i>                                                     | C. Cole (3)       |
| MNY7        | <i>MATa, ade2, his3, leu2, trp1, ura3, crm1Δ::KANMX6 [pDC-CRM1 LEU2]</i>                         | M. Rosbash (4)    |
| MNY8        | <i>MATa, ade2, his3, leu2, trp1, ura3, crm1Δ::KANMX6 [pDC-crm1 (T539C) LEU2]</i>                 | M. Rosbash (4)    |
| Y850        | <i>MATa, ade2, his3, leu2, trp1, ura3, cdc5-1</i>                                                | S. Elledge (2)    |
| JDY851      | <i>MATa, ade2, his3, leu2, trp1, ura3, nop7-GFP(S65T)::natNT2</i>                                | J. de la Cruz (5) |
| SHM596-1    | <i>S288c, MATa, his3, leu2, trp1, ura3, spc42-EQFP611-KANMX6</i>                                 | E. Schiebel (6)   |
| Y00407      | <i>BY4741, MATa, his3, leu2, met15, ura3, nup60Δ::KANMX4</i>                                     | Euroscarf         |
| Y03551      | <i>BY4741, MATa, his3, leu2, met15, ura3, nup42Δ::KANMX4</i>                                     | Euroscarf         |
| Y04917      | <i>BY4741, MATa, his3, leu2, met15, ura3, nup100Δ::KANMX4</i>                                    | Euroscarf         |
| Y05244      | <i>BY4741, MATa, his3, leu2, met15, ura3, nup2Δ::KANMX4</i>                                      | Euroscarf         |
| YGM1        | <i>MATa, ade2, his3, leu2, trp1, ura3, tsr1-GFP(S65T)::TRP1</i>                                  | M. Dosil (7)      |
| YGM15       | <i>MATa, ade2, leu2, ura3, esp1-1, tsr1-GFP(S65T)-KANMX6</i>                                     | This study        |
| YGM62       | <i>MATa, ade2, his3, leu2, trp1, ura3, rrp12Δ::KANMX4 [pGM37; pNOP1-GFP-rrp12 LEU2]</i>          | This study        |
| YGM79       | <i>MATa, ade2, his3, leu2, trp1, ura3, nsa1-GFP(S65T)::natNT2</i>                                | This study        |
| YGM97       | <i>MATa, ade2, his3, leu2, trp1, ura3, enp1-GFP(S65T)::HIS3MX</i>                                | This study        |
| YGM192      | <i>MATa, his3, leu2, met15, ura3, nup116Δ::KANMX6</i>                                            | This study        |
| YGM198      | <i>MATa, ade2, his3, leu2, trp1, ura3, nop7-GFP(S65T)::natNT2, crm1Δ::KANMX6 [pDC-CRM1 LEU2]</i> | This study        |

|        |                                                                                                          |              |
|--------|----------------------------------------------------------------------------------------------------------|--------------|
| YGM200 | <i>MATa, ade2, his3, leu2, trp1, ura3, nop7-GFP(S65T)::natNT2, crm1Δ::KANMX6 [pDC-crm1 (T539C) LEU2]</i> | This study   |
| YGM218 | <i>BY4741, leu2, met15, ura3, csm1Δ::KANMX6, nop7-GFP(S65T)::natNT2</i>                                  | This study   |
| YGM220 | <i>BY4741, leu2, met15, ura3, heh1Δ::KANMX6, nop7-GFP(S65T)::natNT2</i>                                  | This study   |
| YLG1   | <i>MATa, ade2, his3, leu2, trp1, ura3, rio2-GFP(S65T)::HIS3MX</i>                                        | This study   |
| YLG2   | <i>MATa, ade2, his3, leu2, trp1, ura3, ltv1-GFP(S65T)::HIS3MX</i>                                        | This study   |
| YMD6   | <i>MATa, ade2, his3, leu2, trp1, ura3, pwp2-GFP(S65T)::KANMX</i>                                         | This study   |
| YMD24  | <i>MATa, ade2, his3, leu2, trp1, ura3, nop58-GFP(S65T)::TRP1</i>                                         | This study   |
| YPM7   | <i>MATa, ade2, his3, leu2, trp1, ura3, KANM-GAL::HA-rrp12</i>                                            | M. Dosil (7) |
| YSG2   | <i>MATa, ade2, his3, leu2, trp1, ura3, net1-GFP(S65T)::natNT2</i>                                        | This study   |
| YSG13  | <i>MATa, ade2, leu2, ura3, esp1-1, net1-GFP(S65T)-KANMX6</i>                                             | This study   |
| YSG19  | <i>MATa, leu2, trp1, ura3, rat7-1(nup159-1), nop7-GFP(S65T)::natNT2</i>                                  | This study   |
| YSG32  | <i>MATa, ade2, his3, leu2, trp1, ura3, CDC20::pMET3-3HA-cdc20-URA3, nop7-GFP(S65T)::natNT2</i>           | This study   |

\*Unless stated otherwise, strains are isogenic with strain W303

1. Tomson, B. N., D'Amours, D., Adamson, B. S., Aragon, L., and Amon, A. (2006) Ribosomal DNA transcription-dependent processes interfere with chromosome segregation. *Molecular and cellular biology* **26**, 6239-6247
2. Wang, Y., Shirogane, T., Liu, D., Harper, J. W., and Elledge, S. J. (2003) Exit from exit: resetting the cell cycle through Amn1 inhibition of G protein signaling. *Cell* **112**, 697-709
3. Gorsch, L. C., Dockendorff, T. C., and Cole, C. N. (1995) A conditional allele of the novel repeat-containing yeast nucleoporin RAT7/NUP159 causes both rapid cessation of mRNA export and reversible clustering of nuclear pore complexes. *The Journal of cell biology* **129**, 939-955
4. Neville, M., and Rosbash, M. (1999) The NES-Crm1p export pathway is not a major mRNA export route in *Saccharomyces cerevisiae*. *The EMBO journal* **18**, 3746-3756
5. Garcia-Gomez, J. J., Lebaron, S., Froment, C., Monsarrat, B., Henry, Y., and de la Cruz, J. (2011) Dynamics of the putative RNA helicase Spb4 during ribosome assembly in *Saccharomyces cerevisiae*. *Mol Cell Biol* **31**, 4156-4164
6. Sezen, B., Seedorf, M., and Schiebel, E. (2009) The SESA network links duplication of the yeast centrosome with the protein translation machinery. *Genes & development* **23**, 1559-1570
7. Moriggi, G., Nieto, B., and Dosil, M. (2014) Rrp12 and the Exportin Crm1 Participate in Late Assembly Events in the Nucleolus during 40S Ribosomal Subunit Biogenesis. *PLoS Genet* **10**, e1004836
