# Supplementary material for: Focal accumulation of preribosomes outside the nucleolus during metaphase–anaphase in budding yeast
Source: PubMed Central journal article supplement (PMC5558912; doi:10.1261/rna.061259.117), 2017-09
Supplement: supp_061259.117_Supplemental_Table_S2.pdf [file supp_061259.117_Supplemental_Table_S2.pdf]

TABLE S2. **Plasmids used in this study**

| Name                 | Relevant information                             | Source        |
|----------------------|--------------------------------------------------|---------------|
| pBN2                 | CEN, LEU2, pNOP1-rrp12 <sup>1070-1228</sup>      |               |
| pJB1                 | CEN, URA3, tsr1-GFP                              | S. Lemmon (1) |
| pNL25-T              | CEN, TRP1, rpl25-GFP, mRFP-nop1                  | E. Hurt (2)   |
| pGFP-Ulp1            | CEN, LEU2, pNOP1-GFP-ulp1                        | V. Panse (3)  |
| pGM4-5               | CEN, HIS3, pGAL1-Rrp12-mCherry                   | This study    |
| pGM16                | CEN, LEU2, pGAL1-rrp12 <sup>1070-1228</sup> -GFP | This study    |
| pGM34                | CEN, LEU2, pGAL1-rrp12 <sup>198-1228</sup> -GFP  | This study    |
| pGM37                | CEN, LEU2, pNOP1-GFP-rrp12                       | This study    |
| pGM51                | CEN, LEU2, pGAL1-rrp12-GFP                       | This study    |
| pGM57                | CEN, URA3, pNOP1-GFP-rrp12                       | This study    |
| pGM61                | CEN, LEU2, pNOP1-GFP-pwp2                        | This study    |
| pGM62                | CEN, LEU2, pNOP1-GFP-nop7                        | This study    |
| pGM63                | CEN, LEU2, pNOP1-GFP-arx1                        | This study    |
| pGM64                | CEN, LEU2, pNOP1-GFP-ltv1                        | This study    |
| pGM65                | CEN, LEU2, pNOP1-GFP-rio2                        | This study    |
| pLG1                 | CEN, LEU2, pNOP1-rrp12                           | This study    |
| pLG2                 | CEN, LEU2, pNOP1-rrp12 <sup>198-1228</sup>       | This study    |
| pUN100-Nup49-mCherry | CEN, LEU2, nup49-mCherry                         | V. Doye (4)   |

1. Gelperin, D., Horton, L., Beckman, J., Hensold, J. and Lemmon, S.K. (2001) Bms1p, a novel GTP-binding protein, and the related Tsr1p are required for distinct steps of 40S ribosome biogenesis in yeast. *RNA (New York, N.Y.)*, **7**, 1268-1283.
2. Ulbrich, C., Diepholz, M., Bassler, J., Kressler, D., Pertschy, B., Galani, K., Bottcher, B. and Hurt, E. (2009) Mechanochemical removal of ribosome biogenesis factors from nascent 60S ribosomal subunits. *Cell*, **138**, 911-922.
3. Panse, V.G., Kuster, B., Gerstberger, T. and Hurt, E. (2003) Unconventional tethering of Ulp1 to the transport channel of the nuclear pore complex by karyopherins. *Nat Cell Biol*, **5**, 21-27.
4. Chadrin, A., Hess, B., San Roman, M., Gatti, X., Lombard, B., Loew, D., Barral, Y., Palancade, B. and Doye, V. (2010) Pom33, a novel transmembrane nucleoporin required for proper nuclear pore complex distribution. *The Journal of cell biology*, **189**, 795-811.
